# Supplementary material
Source: PubMed Central journal article supplement (PMC7531972)
Supplement: AEM.01651-20-s0001.pdf [file AEM.01651-20-s0001.pdf]

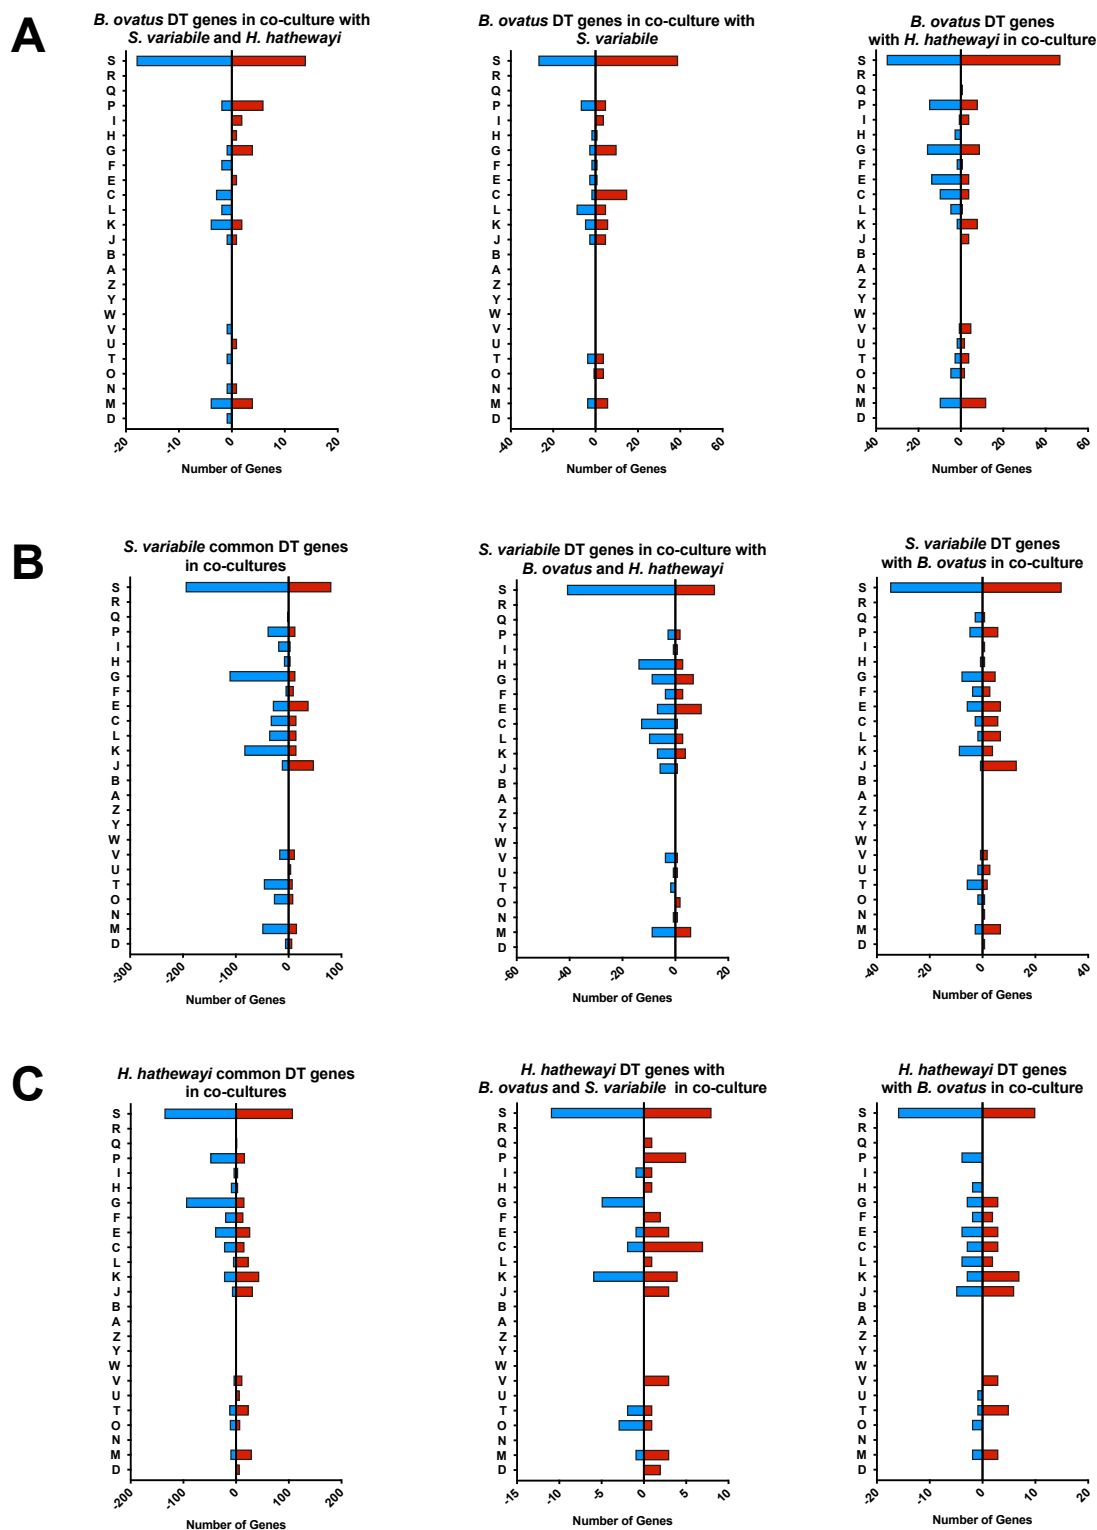

**Figure S1.** Number of differentially transcribed (DT) genes grouped according to Cluster of Orthologous Genes (COG) categories. **A.** *B. ovatus* ATCC 8483<sup>T</sup> DT genes uniquely expressed in co-cultures. *S. variable* DSM 15176<sup>T</sup> (**B**) and *H. hathewayi* DSM 13479<sup>T</sup> (**C**) DT genes uniquely expressed in co-cultures. Genes that

had increased transcription in co-culture compared to pure culture conditions are indicated in red bars, genes with decreased transcription in light blue bars. COG categories: [A], RNA processing and modification; [B], Chromatin structure and dynamics; [C], Energy production and conversion; [D], Cell cycle control cell division chromosome partitioning; [E], Amino acid transport and metabolism; [F], Nucleotide transport and metabolism; [G], Carbohydrate transport and metabolism; [H], Coenzyme transport and metabolism; [I], Lipid transport and metabolism; [J], Translation ribosomal structure and biogenesis; [K], Transcription; [L], Replication recombination and repair; [M], Cell wall/membrane/envelope biogenesis; [N], Cell motility; [O], Post-translational modification protein turnover and chaperones; [P], Inorganic ion transport and metabolism; [Q], Secondary metabolites biosynthesis transport and catabolism; [R], General function prediction only; [S], Function unknown; [T], Signal transduction mechanisms; [U], Intracellular trafficking secretion and vesicular transport; [V], Defense mechanisms; [W], Extracellular structures; [Y], Nuclear structure; [Z], Cytoskeleton.

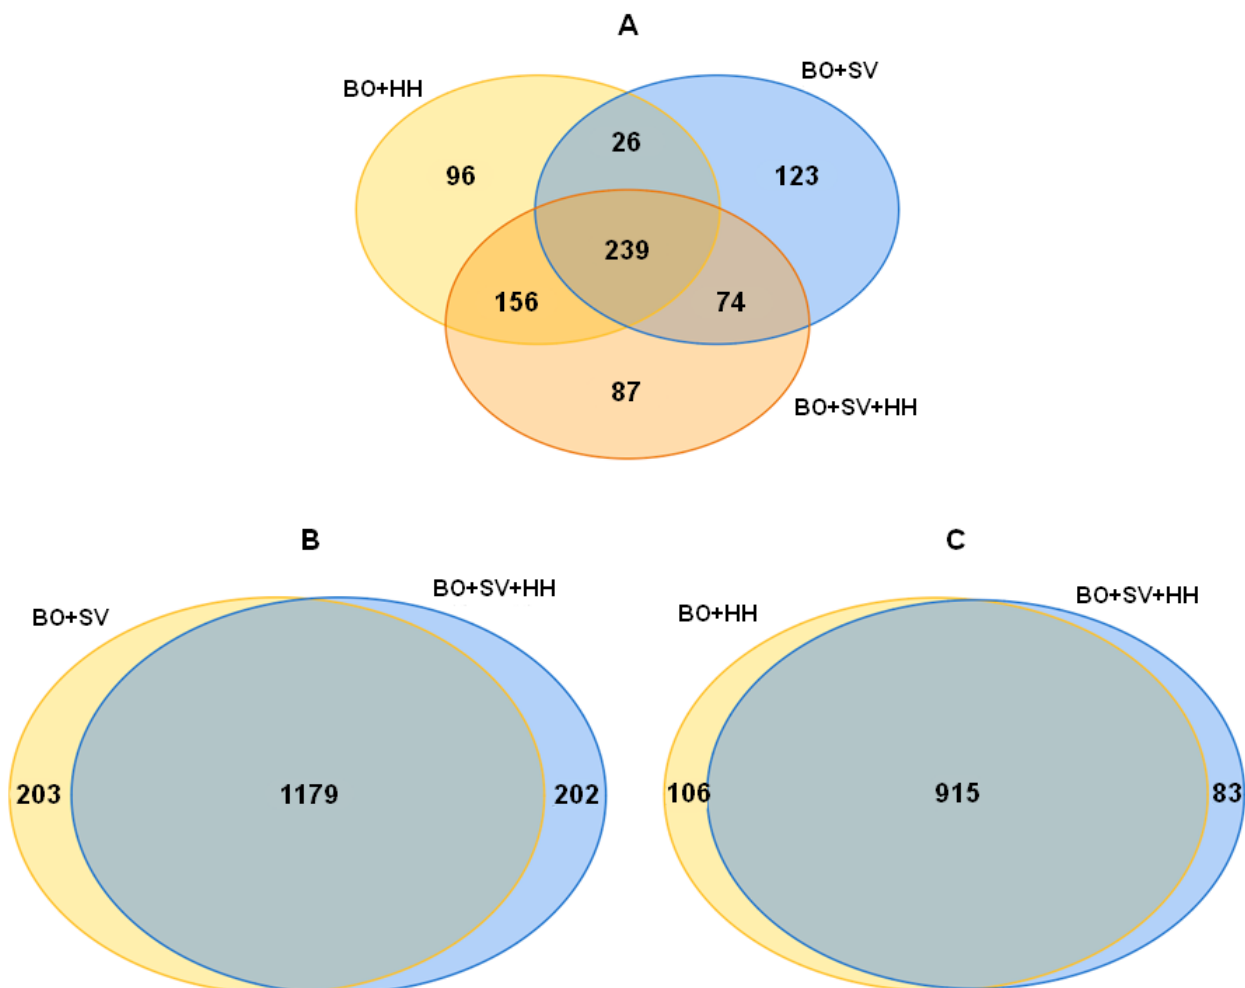

**FIG S2.** Venn diagrams of the number of common and unique differentially transcribed genes of *B. ovatus* ATCC 8483<sup>T</sup> (BO) (**A**), *S. variabile* DSM 15176<sup>T</sup> (SV) (**B**) and *H. hathewayi* DSM 13479<sup>T</sup> (HH) (**C**) in co-cultures.

**Table S1.** Summary of RNA-seq data obtained from all pure and co-culture samples.

BO16, BO20, BO24 and BO26 indicate *B. ovatus* ATCC 8483<sup>T</sup> pure culture samples

at 16, 20, 24 and 26 h, respectively. SV12, SV14, SV16 and SV24 indicate *S.*

*variabile* DSM 15176<sup>T</sup> pure culture samples at 12, 14, 16 and 24 h, respectively.

HH06, HH16, HH18, HH20 and HH24 indicate *H. hathewayi* DSM 13479<sup>T</sup> pure

culture samples at 6, 16, 18, 20 and 24 h, respectively. BO+SV, BO+HH and

BO+SV+HH indicate co-culture samples of *B. ovatus* and *S. variabile*, *B. ovatus* and

*H. hathewayi*, and *B. ovatus*, *S. variabile* and *H. hathewayi*, respectively.

**Pure culture**

| Reference genome                                 |                  | <i>B. ovatus</i> ATCC 8483 <sup>T</sup>    |                  |                  |                   |                   |                  |                  |                   |                   |
|--------------------------------------------------|------------------|--------------------------------------------|------------------|------------------|-------------------|-------------------|------------------|------------------|-------------------|-------------------|
| Sample                                           | BO16             |                                            | BO20             |                  | BO24              |                   | BO26             |                  |                   |                   |
| Biological replicate                             | 1                | 2                                          | 1                | 2                | 1                 | 2                 | 1                | 2                |                   |                   |
| Adapter- and quality-trimmed reads (pair)        | 6275610          | 6171428                                    | 5672569          | 5780334          | 18119414          | 19225175          | 6134182          | 6146063          |                   |                   |
| Reads mapped to genome (pair)                    | 5834141<br>(93%) | 5640524<br>(91%)                           | 5275180<br>(93%) | 5239690<br>(91%) | 15315133<br>(85%) | 16358203<br>(85%) | 5607694<br>(91%) | 5738493<br>(93%) |                   |                   |
| Reads aligned (sense) to protein-coding genes    | 94%              | 94%                                        | 94%              | 94%              | 94%               | 94%               | 93%              | 93%              |                   |                   |
| Reads aligned (antisense) to protein-coding gene | 1%               | 1%                                         | 1%               | 1%               | 1%                | 1%                | 1%               | 1%               |                   |                   |
| Reads aligned (sense) to ribosomal RNAs          | 0%               | 0%                                         | 0%               | 0%               | 0%                | 0%                | 0%               | 0%               |                   |                   |
| Reads aligned (antisense) to ribosomal RNAs      | 0%               | 0%                                         | 0%               | 0%               | 0%                | 0%                | 0%               | 0%               |                   |                   |
| Reads aligned (sense) to transfer RNAs           | 0%               | 0%                                         | 0%               | 0%               | 0%                | 0%                | 0%               | 0%               |                   |                   |
| Reads aligned (antisense) to transfer RNAs       | 0%               | 0%                                         | 0%               | 0%               | 0%                | 0%                | 0%               | 0%               |                   |                   |
| Reads aligned (sense) to miscellaneous RNAs      | 1%               | 0%                                         | 1%               | 1%               | 1%                | 1%                | 1%               | 1%               |                   |                   |
| Reads aligned (antisense) to miscellaneous RNAs  | 0%               | 0%                                         | 0%               | 0%               | 0%                | 0%                | 0%               | 0%               |                   |                   |
| Reads aligned to unannotated regions             | 4%               | 5%                                         | 5%               | 5%               | 4%                | 5%                | 5%               | 5%               |                   |                   |
| Reference genome                                 |                  | <i>S. variabile</i> DSM 15176 <sup>T</sup> |                  |                  |                   |                   |                  |                  |                   |                   |
| Sample                                           | SV12             |                                            | SV14             |                  | SV16              |                   |                  | SV24             |                   |                   |
| Biological replicate                             | 1                | 2                                          | 1                | 2                | 3                 | 1                 | 2                | 3                | 1                 | 2                 |
| Adapter- and quality-trimmed reads (pair)        | 5296033          | 4899087                                    | 5395150          | 5872683          | 4050882           | 5027329           | 5260404          | 4947739          | 16503690          | 16046974          |
| Reads mapped to genome (pair)                    | 4803047<br>(91%) | 4740926<br>(97%)                           | 4963869<br>(92%) | 5326185<br>(91%) | 3412214<br>(84%)  | 4651029<br>(93%)  | 4798418<br>(91%) | 4750547<br>(96%) | 13545113<br>(82%) | 13296521<br>(83%) |
| Reads aligned (sense) to protein-coding genes    | 87%              | 81%                                        | 90%              | 89%              | 86%               | 88%               | 89%              | 90%              | 64%               | 50%               |
| Reads aligned (antisense) to protein-coding gene | 1%               | 2%                                         | 1%               | 1%               | 1%                | 1%                | 1%               | 1%               | 4%                | 5%                |
| Reads aligned (sense) to ribosomal RNAs          | 0%               | 0%                                         | 0%               | 0%               | 0%                | 0%                | 0%               | 0%               | 0%                | 0%                |
| Reads aligned (antisense) to ribosomal RNAs      | 0%               | 0%                                         | 0%               | 0%               | 0%                | 0%                | 0%               | 0%               | 0%                | 0%                |
| Reads aligned (sense) to transfer RNAs           | 0%               | 0%                                         | 0%               | 0%               | 0%                | 0%                | 0%               | 0%               | 0%                | 0%                |
| Reads aligned (antisense) to transfer RNAs       | 0%               | 0%                                         | 0%               | 0%               | 0%                | 0%                | 0%               | 0%               | 0%                | 0%                |
| Reads aligned (sense) to miscellaneous RNAs      | 1%               | 2%                                         | 1%               | 2%               | 2%                | 2%                | 2%               | 1%               | 3%                | 3%                |
| Reads aligned (antisense) to miscellaneous RNAs  | 0%               | 0%                                         | 0%               | 0%               | 0%                | 0%                | 0%               | 0%               | 0%                | 0%                |
| Reads aligned to unannotated regions             | 10%              | 16%                                        | 7%               | 8%               | 11%               | 9%                | 8%               | 8%               | 29%               | 42%               |

| Reference genome                                 | <i>H. hathewayi</i> DSM 13479 <sup>T</sup> |                  |                  |                  |                  |                  |                  |                  |                   |                   |
|--------------------------------------------------|--------------------------------------------|------------------|------------------|------------------|------------------|------------------|------------------|------------------|-------------------|-------------------|
| Sample                                           | HH06                                       |                  | HH16             |                  | HH18             |                  | HH20             |                  | HH24              |                   |
| Biological replicate                             | 1                                          | 2                | 1                | 2                | 1                | 2                | 1                | 2                | 1                 | 2                 |
| Adapter- and quality-trimmed reads (pair)        | 5673589                                    | 5437765          | 5659507          | 5376647          | 5203979          | 5455634          | 5742994          | 5545527          | 16039801          | 18032570          |
| Reads mapped to genome (pair)                    | 4533453<br>(80%)                           | 4371695<br>(80%) | 4580845<br>(81%) | 4422405<br>(82%) | 4407666<br>(85%) | 4613236<br>(85%) | 4888885<br>(85%) | 2748512<br>(50%) | 11533717<br>(72%) | 13561227<br>(75%) |
| Reads aligned (sense) to protein-coding genes    | 77%                                        | 77%              | 76%              | 84%              | 84%              | 83%              | 84%              | 82%              | 48%               | 67%               |
| Reads aligned (antisense) to protein-coding gene | 2%                                         | 3%               | 3%               | 3%               | 3%               | 3%               | 3%               | 3%               | 2%                | 3%                |
| Reads aligned (sense) to ribosomal RNAs          | 0%                                         | 0%               | 0%               | 0%               | 0%               | 0%               | 0%               | 0%               | 0%                | 0%                |
| Reads aligned (antisense) to ribosomal RNAs      | 0%                                         | 0%               | 0%               | 0%               | 0%               | 0%               | 0%               | 0%               | 0%                | 0%                |
| Reads aligned (sense) to transfer RNAs           | 0%                                         | 0%               | 0%               | 0%               | 0%               | 0%               | 0%               | 0%               | 0%                | 0%                |
| Reads aligned (antisense) to transfer RNAs       | 0%                                         | 0%               | 0%               | 0%               | 0%               | 0%               | 0%               | 0%               | 0%                | 0%                |
| Reads aligned (sense) to miscellaneous RNAs      | 1%                                         | 1%               | 1%               | 1%               | 0%               | 0%               | 0%               | 1%               | 2%                | 1%                |
| Reads aligned (antisense) to miscellaneous RNAs  | 0%                                         | 0%               | 0%               | 0%               | 0%               | 0%               | 0%               | 0%               | 0%                | 0%                |
| Reads aligned to unannotated regions             | 20%                                        | 20%              | 20%              | 13%              | 12%              | 13%              | 12%              | 14%              | 48%               | 40%               |

## Co-culture

| Sample                                           | BO+SV                                  |                  |                                           |                  | BO+HH                                  |                  |                                            |                | BO+SV+HH                               |                  |                                           |               |                                            |                 |
|--------------------------------------------------|----------------------------------------|------------------|-------------------------------------------|------------------|----------------------------------------|------------------|--------------------------------------------|----------------|----------------------------------------|------------------|-------------------------------------------|---------------|--------------------------------------------|-----------------|
|                                                  | <i>B.ovatus</i> ATCC 8483 <sup>T</sup> |                  | <i>S. variable</i> DSM 15176 <sup>T</sup> |                  | <i>B.ovatus</i> ATCC 8483 <sup>T</sup> |                  | <i>H. hathewayi</i> DSM 13479 <sup>T</sup> |                | <i>B.ovatus</i> ATCC 8483 <sup>T</sup> |                  | <i>S. variable</i> DSM 15176 <sup>T</sup> |               | <i>H. hathewayi</i> DSM 13479 <sup>T</sup> |                 |
| Biological replicate                             | 1                                      | 2                | 1                                         | 2                | 1                                      | 2                | 1                                          | 2              | 1                                      | 2                | 1                                         | 2             | 1                                          | 2               |
| Adapter- and quality-trimmed reads (pair)        | 5563190                                | 7185843          | 5563190                                   | 7185843          | 5310034                                | 5463546          | 5310034                                    | 5463546        | 5664614                                | 5625551          | 5664614                                   | 5625551       | 5664614                                    | 5625551         |
| Reads mapped to genome (pair)                    | 2541504<br>(46%)                       | 3477039<br>(48%) | 959115<br>(17%)                           | 1067613<br>(15%) | 2879519<br>(54%)                       | 2988344<br>(55%) | 541846<br>(10%)                            | 507501<br>(9%) | 2873130<br>(51%)                       | 2814112<br>(50%) | 50819<br>(1%)                             | 28326<br>(1%) | 619989<br>(11%)                            | 611988<br>(11%) |
| Reads aligned (sense) to protein-coding genes    | 94%                                    | 94%              | 89%                                       | 89%              | 94%                                    | 94%              | 71%                                        | 67%            | 94%                                    | 94%              | 84%                                       | 78%           | 80%                                        | 76%             |
| Reads aligned (antisense) to protein-coding gene | 1%                                     | 1%               | 1%                                        | 1%               | 1%                                     | 1%               | 3%                                         | 3%             | 1%                                     | 1%               | 1%                                        | 2%            | 3%                                         | 3%              |
| Reads aligned (sense) to ribosomal RNAs          | 0%                                     | 0%               | 0%                                        | 0%               | 0%                                     | 0%               | 0%                                         | 0%             | 0%                                     | 0%               | 0%                                        | 0%            | 0%                                         | 0%              |
| Reads aligned (antisense) to ribosomal RNAs      | 0%                                     | 0%               | 0%                                        | 0%               | 0%                                     | 0%               | 0%                                         | 0%             | 0%                                     | 0%               | 0%                                        | 0%            | 0%                                         | 0%              |
| Reads aligned (sense) to transfer RNAs           | 0%                                     | 0%               | 0%                                        | 0%               | 0%                                     | 0%               | 0%                                         | 0%             | 0%                                     | 0%               | 0%                                        | 0%            | 0%                                         | 0%              |
| Reads aligned (antisense) to transfer RNAs       | 0%                                     | 0%               | 0%                                        | 0%               | 0%                                     | 0%               | 0%                                         | 0%             | 0%                                     | 0%               | 0%                                        | 0%            | 0%                                         | 0%              |
| Reads aligned (sense) to miscellaneous RNAs      | 1%                                     | 1%               | 2%                                        | 2%               | 0%                                     | 1%               | 1%                                         | 1%             | 0%                                     | 0%               | 2%                                        | 3%            | 1%                                         | 1%              |
| Reads aligned (antisense) to miscellaneous RNAs  | 0%                                     | 0%               | 0%                                        | 0%               | 0%                                     | 0%               | 0%                                         | 0%             | 0%                                     | 0%               | 0%                                        | 0%            | 0%                                         | 0%              |
| Reads aligned to unannotated regions             | 5%                                     | 5%               | 8%                                        | 8%               | 5%                                     | 5%               | 25%                                        | 29%            | 5%                                     | 5%               | 12%                                       | 17%           | 16%                                        | 20%             |

**Table S2.** List of enriched and depleted GO terms and their category number for each individual species in each co-culture condition.

| <i>B. ovatus</i> ATCC 8483 <sup>T</sup> perspective    |                   |                                                                             |                   |                                                                                    |
|--------------------------------------------------------|-------------------|-----------------------------------------------------------------------------|-------------------|------------------------------------------------------------------------------------|
|                                                        | Enriched GO terms |                                                                             | Depleted GO terms |                                                                                    |
| <b>Common between BO+SV+HH, BO+SV and BO+HH</b>        | -                 | -                                                                           | GO:0046872        | metal ion binding                                                                  |
|                                                        |                   |                                                                             | GO:0030001        | metal ion transport                                                                |
| <b>Common between BO+SV+HH and BO+HH</b>               | GO:0020037        | heme binding                                                                | GO:0006568        | tryptophan metabolic process                                                       |
|                                                        | GO:0017004        | cytochrome complex assembly                                                 | GO:0046373        | L-arabinose metabolic process                                                      |
|                                                        | GO:0006814        | sodium ion transport                                                        | GO:0046556        | alpha-L-arabinofuranosidase activity                                               |
|                                                        | GO:0008565        | protein transporter activity                                                | GO:0003697        | single-stranded DNA binding                                                        |
| <b>Unique to BO+HH</b>                                 | GO:0016887        | ATPase activity                                                             | GO:0005215        | transporter activity                                                               |
|                                                        | GO:0005622        | intracellular                                                               | GO:0016491        | oxidoreductase activity                                                            |
| <b>Common between BO+SV+HH and BO+SV</b>               | -                 | -                                                                           | GO:0015655        | alanine:sodium symporter activity                                                  |
|                                                        |                   |                                                                             | GO:0032328        | alanine transport                                                                  |
|                                                        |                   |                                                                             | GO:0043565        | sequence-specific DNA binding                                                      |
| <b>Unique to BO+SV</b>                                 | GO:0016861        | intramolecular oxidoreductase activity, interconverting aldoses and ketoses | GO:0007165        | signal transduction                                                                |
|                                                        | GO:0016310        | phosphorylation                                                             | GO:0006310        | DNA recombination                                                                  |
|                                                        | GO:0030599        | pectinesterase activity                                                     | GO:0005515        | protein binding                                                                    |
|                                                        | GO:0042545        | cell wall modification                                                      | GO:0004565        | beta-galactosidase activity                                                        |
|                                                        | GO:0006457        | protein folding                                                             | GO:0009341        | beta-galactosidase complex                                                         |
|                                                        | GO:0004872        | receptor activity                                                           | GO:0052855        | ADP-dependent NAD(P)H-hydrate dehydratase activity                                 |
|                                                        | GO:0005618        | cell wall                                                                   | GO:0042279        | nitrite reductase (cytochrome, ammonia-forming) activity                           |
|                                                        |                   |                                                                             | GO:0004673        | protein histidine kinase activity                                                  |
|                                                        |                   |                                                                             | GO:0051536        | iron-sulfur cluster binding                                                        |
|                                                        |                   |                                                                             | GO:0006270        | DNA replication initiation                                                         |
|                                                        |                   |                                                                             | GO:0019288        | isopentenyl diphosphate biosynthetic process, methylerythritol 4-phosphate pathway |
|                                                        |                   |                                                                             | GO:0050992        | dimethylallyl diphosphate biosynthetic process                                     |
|                                                        |                   |                                                                             | GO:0051745        | 4-hydroxy-3-methylbut-2-en-1-yl diphosphate reductase activity                     |
|                                                        |                   |                                                                             | GO:0004594        | pantothenate kinase activity                                                       |
|                                                        |                   |                                                                             | GO:0015074        | DNA integration                                                                    |
|                                                        |                   |                                                                             | GO:0004784        | superoxide dismutase activity                                                      |
|                                                        |                   |                                                                             | GO:0006801        | superoxide metabolic process                                                       |
| <b>Unique to BO+SV+HH</b>                              | GO:0008948        | oxaloacetate decarboxylase activity                                         | GO:0046873        | metal ion transmembrane transporter activity                                       |
|                                                        | GO:0015081        | sodium ion transmembrane transporter activity                               | GO:0005506        | iron ion binding                                                                   |
|                                                        | GO:0071436        | sodium ion export                                                           |                   |                                                                                    |
|                                                        | GO:0016829        | lyase activity                                                              |                   |                                                                                    |
|                                                        | GO:0008654        | phospholipid biosynthetic process                                           |                   |                                                                                    |
| <i>S. variabile</i> DSM 15176 <sup>T</sup> perspective |                   |                                                                             |                   |                                                                                    |
|                                                        | Enriched GO terms |                                                                             | Depleted GO terms |                                                                                    |
| <b>Common between BO+SV+HH and BO+SV</b>               | GO:0003735        | structural constituent of ribosome                                          | GO:0043565        | sequence-specific DNA binding                                                      |
|                                                        | GO:0006412        | translation                                                                 | GO:0006355        | regulation of transcription, DNA-templated                                         |
|                                                        | GO:0005840        | ribosome                                                                    | GO:0003700        | transcription factor activity, sequence-specific DNA binding                       |
|                                                        | GO:0005622        | intracellular                                                               | GO:0005975        | carbohydrate metabolic process                                                     |
|                                                        | GO:0004812        | aminoacyl-tRNA ligase activity                                              | GO:0055114        | oxidation-reduction process                                                        |
|                                                        | GO:0042626        | ATPase activity, coupled to transmembrane movement of substances            | GO:0016491        | oxidoreductase activity                                                            |
|                                                        | GO:0016021        | integral component of membrane                                              | GO:0004553        | hydrolase activity, hydrolyzing O-glycosyl compounds                               |
|                                                        | GO:0055085        | transmembrane transport                                                     | GO:0006064        | glucuronate catabolic process                                                      |
|                                                        | GO:0000166        | nucleotide binding                                                          | GO:0000160        | phosphorelay signal transduction system                                            |
|                                                        | GO:0006418        | tRNA aminoacylation for protein translation                                 | GO:0045454        | cell redox homeostasis                                                             |
|                                                        | GO:0030246        | carbohydrate binding                                                        | GO:0008927        | mannonate dehydratase activity                                                     |
|                                                        | GO:0042173        | regulation of sporulation resulting in formation of a cellular spore        |                   |                                                                                    |
| <b>Unique to BO+SV+HH</b>                              | GO:0006614        | SRP-dependent cotranslational protein targeting to membrane                 | GO:0006281        | DNA repair                                                                         |
|                                                        | GO:0009116        | nucleoside metabolic process                                                |                   |                                                                                    |

|                                                       |                   |                                                                 |                   |                                                                    |
|-------------------------------------------------------|-------------------|-----------------------------------------------------------------|-------------------|--------------------------------------------------------------------|
|                                                       | GO:0015986        | ATP synthesis coupled proton transport                          |                   |                                                                    |
|                                                       | GO:0015078        | hydrogen ion transmembrane transporter activity                 |                   |                                                                    |
|                                                       | GO:0008184        | glycogen phosphorylase activity                                 |                   |                                                                    |
|                                                       | GO:0006396        | RNA processing                                                  |                   |                                                                    |
|                                                       | GO:0006810        | transport                                                       |                   |                                                                    |
|                                                       | GO:0006520        | cellular amino acid metabolic process                           |                   |                                                                    |
| <b>Unique to BO+SV</b>                                | GO:0004356        | glutamate-ammonia ligase activity                               | GO:0050662        | coenzyme binding                                                   |
|                                                       | GO:0003924        | GTPase activity                                                 | GO:0030288        | outer membrane-bounded periplasmic space                           |
|                                                       | GO:0000049        | tRNA binding                                                    |                   |                                                                    |
|                                                       | GO:0009086        | methionine biosynthetic process                                 |                   |                                                                    |
|                                                       | GO:0019888        | protein phosphatase regulator activity                          |                   |                                                                    |
|                                                       | GO:0030289        | protein phosphatase 4 complex                                   |                   |                                                                    |
|                                                       | GO:0015031        | protein transport                                               |                   |                                                                    |
| <hr/>                                                 |                   |                                                                 |                   |                                                                    |
| <b>H. hathewayi DSM 13479<sup>T</sup> perspective</b> |                   |                                                                 |                   |                                                                    |
|                                                       | Enriched GO terms |                                                                 | Depleted GO terms |                                                                    |
| <b>Common between BO+SV+HH and BO+HH</b>              | GO:0003735        | structural constituent of ribosome                              | GO:0006810        | transport                                                          |
|                                                       | GO:0005840        | ribosome                                                        | GO:0055114        | oxidation-reduction process                                        |
|                                                       | GO:0006412        | translation                                                     | GO:0006777        | Mo-molybdopterin cofactor biosynthetic process                     |
|                                                       | GO:0005622        | intracellular                                                   | GO:0004134        | 4-alpha-glucanotransferase activity                                |
|                                                       | GO:0005525        | GTP binding                                                     | GO:0016491        | oxidoreductase activity                                            |
|                                                       | GO:0004812        | aminoacyl-tRNA ligase activity                                  | GO:0045454        | cell redox homeostasis                                             |
|                                                       | GO:0015986        | ATP synthesis coupled proton transport                          | GO:0005506        | iron ion binding                                                   |
|                                                       | GO:0006418        | tRNA aminoacylation for protein translation                     | GO:0008452        | RNA ligase activity                                                |
|                                                       | GO:0015078        | hydrogen ion transmembrane transporter activity                 | GO:0009116        | nucleoside metabolic process                                       |
|                                                       | GO:0000166        | nucleotide binding                                              |                   |                                                                    |
|                                                       | GO:0045263        | proton-transporting ATP synthase complex, coupling factor F(o)  |                   |                                                                    |
|                                                       | GO:0004594        | pantothenate kinase activity                                    |                   |                                                                    |
|                                                       | GO:0016876        | ligase activity, forming aminoacyl-tRNA and related compounds   |                   |                                                                    |
|                                                       | GO:0043039        | tRNA aminoacylation                                             |                   |                                                                    |
|                                                       | GO:0016021        | integral component of membrane                                  |                   |                                                                    |
|                                                       | GO:0003924        | GTPase activity                                                 |                   |                                                                    |
|                                                       | GO:0006633        | fatty acid biosynthetic process                                 |                   |                                                                    |
|                                                       | GO:0009007        | site-specific DNA-methyltransferase (adenine-specific) activity |                   |                                                                    |
|                                                       | GO:0032775        | DNA methylation on adenine                                      |                   |                                                                    |
|                                                       | GO:0008033        | tRNA processing                                                 |                   |                                                                    |
| <b>Unique to BO+SV+HH</b>                             | GO:0006400        | tRNA modification                                               | GO:0005975        | carbohydrate metabolic process                                     |
|                                                       | GO:0015991        | ATP hydrolysis coupled proton transport                         |                   |                                                                    |
|                                                       | GO:0003899        | DNA-directed RNA polymerase activity                            |                   |                                                                    |
|                                                       | GO:0006351        | transcription, DNA-templated                                    |                   |                                                                    |
|                                                       | GO:0005328        | neurotransmitter:sodium symporter activity                      |                   |                                                                    |
|                                                       | GO:0006836        | neurotransmitter transport                                      |                   |                                                                    |
|                                                       | GO:0006855        | drug transmembrane transport                                    |                   |                                                                    |
|                                                       | GO:0015238        | drug transmembrane transporter activity                         |                   |                                                                    |
|                                                       | GO:0015297        | antiporter activity                                             |                   |                                                                    |
|                                                       | GO:0046933        | proton-transporting ATP synthase activity, rotational mechanism |                   |                                                                    |
| <b>Unique to BO+HH</b>                                | GO:0009002        | serine-type D-Ala-D-Ala carboxypeptidase activity               | GO:0015558        | p-aminobenzoyl-glutamate uptake transmembrane transporter activity |
|                                                       | GO:0006164        | purine nucleotide biosynthetic process                          | GO:1902604        | p-aminobenzoyl-glutamate transmembrane transport                   |
|                                                       | GO:0015031        | protein transport                                               |                   |                                                                    |

**Table S3.** List of primer sets used for RT-qPCR. All primer sets were designed in this study.

| Name                                             | Sequence             | Target <sup>a</sup>          |                                                        |
|--------------------------------------------------|----------------------|------------------------------|--------------------------------------------------------|
|                                                  |                      | Gene name                    | Product                                                |
| <b><i>B. ovatus</i> ATCC 8483<sup>T</sup></b>    |                      |                              |                                                        |
| Bovatus_RS01400_F                                | CGTTTCTATCTGTGCCGTGG | Bovatus_RS01400              | MFS transporter                                        |
| Bovatus_RS01400_R                                | TGAGGGCGAACAGGAAGAAT |                              |                                                        |
| Bovatus_RS15290_F                                | AGACTAACGGCGGACTATGG | Bovatus_RS15290              | Glycoside hydrolase family 16 protein                  |
| Bovatus_RS15290_R                                | TCCGCTCTGTTCTCCATTT  |                              |                                                        |
| Bovatus_RS15310_F                                | CTTGTGGCTTCGCTTACTCC | Bovatus_RS15310              | Beta-glucosidase                                       |
| Bovatus_RS15310_R                                | CCCCTTGTCCAGTACCCAT  |                              |                                                        |
| Bovatus_RS21310_F                                | GTCTTGGAGCGGCAGTAATG | Bovatus_RS21310              | PTS sugar transporter subunit IIC                      |
| Bovatus_RS21310_R                                | GAGCAATGCCGTCCTACTG  |                              |                                                        |
| Bovatus_RS06075_F                                | GGGAGCTAATCAAAGGCCGG | Bovatus_RS06075              | ABC transporter ATP binding protein                    |
| Bovatus_RS06075_R                                | GGGCAATCGTTGTTTTCCCT |                              |                                                        |
| Bovatus_RS09210_F                                | AGAGTGCTTATCCTCCCTGC | Bovatus_RS09210              | Molecular chaperone GroES                              |
| Bovatus_RS09210_R                                | CCGTGACCTATTGCCACAAC |                              |                                                        |
| Bovatus_RS03700_F                                | CGAGGTGGACAAAGTTGGTG | Bovatus_RS03700 <sup>b</sup> | DNA polymerase III subunit delta                       |
| Bovatus_RS03700_R                                | TCTGTTCAGGAGTTACGCGT |                              |                                                        |
| <b><i>S. variable</i> DSM 15176<sup>T</sup></b>  |                      |                              |                                                        |
| SUBVAR_RS12285_F                                 | CAGCAGAACATCATCACCGG | SUBVAR_RS12285               | Carbohydrate ABC transporter permease                  |
| SUBVAR_RS12285_R                                 | CCCGBAATGACGTATACCCA |                              |                                                        |
| SUBVAR_RS12505_F                                 | CTCCGGCTCCATCTATGTGT | SUBVAR_RS12505               | PTS beta-glucoside transporter subunit IIBCA           |
| SUBVAR_RS12505_R                                 | GAGGTTGGGGTGGATCATCA |                              |                                                        |
| SUBVAR_RS14140_F                                 | CAACGACAATGTGCTACCCC | SUBVAR_RS14140               | Beta-glucosidase                                       |
| SUBVAR_RS14140_R                                 | CAATCTTCGCTGGTCAGGTG |                              |                                                        |
| SUBVAR_RS14155_F                                 | CTCCCGCATTATCAGGACT  | SUBVAR_RS14155               | Carbohydrate ABC transporter substrate binding protein |
| SUBVAR_RS14155_R                                 | CCCTGGAAGTAGTCGCTGAA |                              |                                                        |
| SUBVAR_RS14170_F                                 | TTGAGACCAGCCGCATCTA  | SUBVAR_RS14170               | Cellobiose phosphorylase                               |
| SUBVAR_RS14170_R                                 | TTCATCAAAGTTCGGCGG   |                              |                                                        |
| SUBVAR_RS02860_F                                 | TTCAATTTGCCGGATCGTG  | SUBVAR_RS02860               | CidA/LrgA family protein                               |
| SUBVAR_RS02860_R                                 | ACCTGTTCCAGTCTGAGCAA |                              |                                                        |
| SUBVAR_RS02935_F                                 | ACCATCCCAACAAGAAGAG  | SUBVAR_RS02935               | Molecular chaperone DnaK                               |
| SUBVAR_RS02935_R                                 | TTGCTCATGTTGGTGAAGC  |                              |                                                        |
| SUBVAR_RS15530_F                                 | CCTACTTTGCGGATCTGGC  | SUBVAR_RS15530 <sup>b</sup>  | Class D sortase                                        |
| SUBVAR_RS15530_R                                 | CTCCCCAGCGAACCTTATCA |                              |                                                        |
| <b><i>H. hathewayi</i> DSM 13479<sup>T</sup></b> |                      |                              |                                                        |
| CLOSTHATH_RS01805_F                              | CCAAGTTTTGCCATACCCC  | CLOSTHATH_RS01805            | Glucan binding protein                                 |
| CLOSTHATH_RS01805_R                              | CAGCCGGTAACCAAATAGCC |                              |                                                        |
| CLOSTHATH_RS19270_F                              | CGACGACACAGATTCAGCAG | CLOSTHATH_RS19270            | Carbohydrate ABC transporter permease                  |
| CLOSTHATH_RS19270_R                              | GGCCGTCATTGTGAAAAAGT |                              |                                                        |
| CLOSTHATH_RS02765_F                              | GGCGGAAATAAGGAAGCAGG | CLOSTHATH_RS02765            | Sugar ABC transporter substrate binding protein        |
| CLOSTHATH_RS02765_R                              | GTCTCCTTCGTGAAATCGGC |                              |                                                        |
| CLOSTHATH_RS07435_F                              | CCGCTGGTATTTCTGTACGC | CLOSTHATH_RS07435            | Iron ABC transporter permease                          |
| CLOSTHATH_RS07435_R                              | CCTTCGCCGATTAACATGGG |                              |                                                        |
| CLOSTHATH_RS09305_F                              | CTCTTGGCGTGGATCATGTG | CLOSTHATH_RS09305            | Stage III sporulation protein J                        |



|                     |                      |                                |                                             |
|---------------------|----------------------|--------------------------------|---------------------------------------------|
| CLOSTHATH_RS09305_R | TTCCACGATCGTTCCTGAA  |                                |                                             |
| CLOSTHATH_RS16585_F | ATGCAGTCCATCAGCTCAGT | CLOSTHATH_RS16585              | MATE family efflux transporter              |
| CLOSTHATH_RS16585_R | GATACAAAAGCTGCTCCGGG |                                |                                             |
| CLOSTHATH_RS09845_F | GGCGATGCTGGTGAAAATCT | CLOSTHATH_RS09845 <sup>b</sup> | Sigma 70 family RNA polymerase sigma factor |
| CLOSTHATH_RS09845_R | CGGAATGGTTCTCTGCTCGA |                                |                                             |

---

<sup>a</sup> *B. ovatus* ATCC 8483<sup>T</sup>, *S. variabile* DSM 15176<sup>T</sup> and *H. hathewayi* DSM 13479<sup>T</sup> reference genome locus tags, respectively.

<sup>b</sup> Reference genes used for gene expression level normalization.

**Table S4.** Transcriptional level of selected gene targets for *B. ovatus* ATCC 8483<sup>T</sup>, *S. variabile* DSM 15176<sup>T</sup> and *H. hathewayi* DSM 13479<sup>T</sup>, measured by RT-qPCR and RNA-seq. Expression levels of DT genes are indicated as log<sub>2</sub> fold change (Log2FC) for comparison between condition 1 and 2, as indicated in the Table. BO16, BO20, BO24 and BO26 indicate *B. ovatus* pure culture samples at 16, 20, 24 and 26 h, respectively. SV12, SV14, SV16 and SV24 indicate *S. variabile* pure culture samples at 12, 14, 16 and 24 h, respectively. HH06, HH16, HH18, HH20 and HH24 indicate *H. hathewayi* pure culture samples at 6, 16, 18, 20 and 24 h, respectively. BO+SV, BO+HH and BO+SV+HH indicate co-culture samples of *B. ovatus* and *S. variabile*, *B. ovatus* and *H. hathewayi*, and *B. ovatus*, *S. variabile* and *H. hathewayi*, respectively. RT-qPCR values are means of all the biological replicates, and for each biological replicate three technical replicates were measured, ± SEM (standard error of the mean).

|                                       |                 | <i>Bacteroides ovatus</i> ATCC 8483 <sup>T</sup>        |       |                 |        |                |        |                   |       |                   |       |                 |       |       |       |       |
|---------------------------------------|-----------------|---------------------------------------------------------|-------|-----------------|--------|----------------|--------|-------------------|-------|-------------------|-------|-----------------|-------|-------|-------|-------|
|                                       |                 | Pure culture                                            |       |                 |        |                |        | Co-culture        |       |                   |       |                 |       |       |       |       |
|                                       |                 | BO16 vs. BO20                                           |       | BO16 vs. BO26   |        | BO+HH vs. BO24 |        | BO+SV vs. BO24    |       | BO+SV+HH vs. BO24 |       |                 |       |       |       |       |
|                                       |                 | RT-qPCR                                                 |       | RNA-seq results |        | RT-qPCR        |        | RNA-seq results   |       | RT-qPCR           |       | RNA-seq results |       |       |       |       |
| Mean Log2FC                           |                 | SEM                                                     |       | Mean Log2FC     |        | SEM            |        | Mean Log2FC       |       | SEM               |       | Mean Log2FC     |       | SEM   |       |       |
| MFS transporter                       | Bovatus_RS01400 | -1.065                                                  | 0.093 | -1.668          | -1.373 | 0.081          | -1.659 |                   | 0.998 | 0.241             | 1.049 |                 |       |       |       |       |
| Glycoside hydrolase family 16 protein | Bovatus_RS15290 | 4.080                                                   | 0.327 | 3.786           | 7.016  | 0.600          | 7.074  | 7.562             | 0.807 | 6.695             |       |                 | 6.363 | 0.221 | 5.395 |       |
| Beta glucosidase                      | Bovatus_RS15310 | 2.911                                                   | 0.382 | 2.542           | 7.491  | 0.841          | 6.996  | 7.742             | 0.677 | 6.862             | 1.995 | 1.203           | 1.345 | 7.025 | 0.606 | 6.159 |
| PTS sugar transporter subunit IIC     | Bovatus_RS21310 | 1.424                                                   | 0.145 | 1.203           |        |                |        | 1.099             | 0.318 | 1.069             | 1.937 | 0.302           | 2.006 | 1.541 | 0.071 | 1.886 |
| ABC transporter ATP binding protein   | Bovatus_RS06075 |                                                         |       |                 |        |                |        | 1.688             | 0.050 | 4.486             |       |                 |       | 2.020 | 0.139 | 4.892 |
| Molecular chaperone GroES             | Bovatus_RS09210 |                                                         |       |                 |        |                |        |                   |       |                   | 1.749 | 0.512           | 1.919 | 1.061 | 0.423 | 1.389 |
|                                       |                 | <i>Subdoligranulum variabile</i> DSM 15176 <sup>T</sup> |       |                 |        |                |        |                   |       |                   |       |                 |       |       |       |       |
|                                       |                 | Pure culture                                            |       |                 |        |                |        | Co-culture        |       |                   |       |                 |       |       |       |       |
|                                       |                 | SV12 vs. SV14                                           |       | SV12 vs. SV16   |        | BO+SV vs. SV24 |        | BO+SV+HH vs. SV24 |       |                   |       |                 |       |       |       |       |
|                                       |                 | RT-qPCR                                                 |       | RNA-seq results |        | RT-qPCR        |        | RNA-seq results   |       | RT-qPCR           |       | RNA-seq results |       |       |       |       |
| Mean Log2FC                           |                 | SEM                                                     |       | Mean Log2FC     |        | SEM            |        | Mean Log2FC       |       | SEM               |       | Mean Log2FC     |       | SEM   |       |       |

|                                                        |                |       |       |       |       |       |       |        |       |        |        |       |        |
|--------------------------------------------------------|----------------|-------|-------|-------|-------|-------|-------|--------|-------|--------|--------|-------|--------|
| Carbohydrate ABC transporter permease                  | SUBVAR_RS12285 | 1.728 | 0.184 | 1.487 | 1.561 | 0.076 | 1.109 | -2.169 | 1.116 | -2.595 | -1.853 | 0.384 | -2.442 |
| PTS beta glucosidase transporter subunit IIBCA         | SUBVAR_RS12505 | 2.215 | 0.138 | 2.126 | 2.659 | 0.020 | 2.497 | -6.686 | 1.059 | -7.116 | -6.166 | 0.031 | -5.950 |
| Beta glucosidase                                       | SUBVAR_RS14140 |       |       |       |       |       |       | 2.158  | 0.954 | 1.712  | 2.079  | 0.295 | 1.804  |
| Carbohydrate ABC transporter substrate binding protein | SUBVAR_RS14155 |       |       |       |       |       |       | 2.283  | 0.321 | 1.549  | 2.771  | 0.268 | 1.911  |
| Cellobiose phosphorylase                               | SUBVAR_RS14170 |       |       |       |       |       |       | 3.220  | 0.135 | 2.020  | 3.590  | 0.147 | 2.785  |
| CidA/LrgA family protein                               | SUBVAR_RS02860 |       |       |       |       |       |       | 4.123  | 0.002 | 4.617  | 4.260  | 0.174 | 3.864  |
| Molecular chaperone DnaK                               | SUBVAR_RS02935 |       |       |       |       |       |       | -3.367 | 0.216 | -3.404 | -2.655 | 0.109 | -3.737 |

***Hungatella hathewayi* DSM 13479<sup>T</sup>**

|                                                 |                   | Pure culture  |       |                 |               |       |                 |               |       |                 | Co-culture     |       |                 |                   |       |                 |
|-------------------------------------------------|-------------------|---------------|-------|-----------------|---------------|-------|-----------------|---------------|-------|-----------------|----------------|-------|-----------------|-------------------|-------|-----------------|
|                                                 |                   | HH06 vs. HH16 |       |                 | HH06 vs. HH18 |       |                 | HH06 vs. HH20 |       |                 | BO+HH vs. HH24 |       |                 | BO+SV+HH vs. HH24 |       |                 |
|                                                 |                   | RT-qPCR       |       | RNA-seq results | RT-qPCR       |       | RNA-seq results | RT-qPCR       |       | RNA-seq results | RT-qPCR        |       | RNA-seq results | RT-qPCR           |       | RNA-seq results |
|                                                 |                   | Mean Log2FC   | SEM   | Log2FC          | Mean Log2FC   | SEM   | Log2FC          | Mean Log2FC   | SEM   | Log2FC          | Mean Log2FC    | SEM   | Log2FC          | Mean Log2FC       | SEM   | Log2FC          |
| Glucan binding protein                          | CLOSTHATH_RS01805 | 1.647         | 0.243 | 1.643           | 2.141         | 0.261 | 1.805           | 2.557         | 0.235 | 2.099           |                |       |                 |                   |       |                 |
| Carbohydrate ABC transporter permease           | CLOSTHATH_RS19270 | -5.370        | 0.406 | -7.013          | -5.611        | 0.006 | -7.289          | -4.785        | 0.121 | -6.755          |                |       |                 |                   |       |                 |
| Sugar ABC transporter substrate binding protein | CLOSTHATH_RS02765 | 4.447         | 0.503 | 3.820           | 5.502         | 0.271 | 4.728           | 5.807         | 0.550 | 4.754           | 3.832          | 0.876 | 3.566           | 3.686             | 1.340 | 3.317           |
| Iron ABC transporter permease                   | CLOSTHATH_RS07435 | 4.729         | 0.123 | 4.872           | 6.537         | 0.214 | 7.646           | 5.683         | 0.705 | 6.126           | -2.157         | 0.156 | -4.349          | -1.319            | 0.039 | -1.642          |
| Stage III sporulation protein J                 | CLOSTHATH_RS09305 | -1.497        | 0.029 | -1.472          | -1.534        | 0.325 | -1.687          | -1.227        | 0.152 | -1.583          | 2.431          | 0.346 | 2.339           | 2.725             | 0.207 | 2.469           |
| MATE family efflux transporter                  | CLOSTHATH_RS16585 | -1.051        | 0.040 | -1.405          | -1.098        | 0.123 | -1.911          | -0.879        | 0.087 | -1.868          | 1.534          | 0.987 | 2.291           | 1.276             | 0.698 | 2.084           |
